# Supplementary material for: γδ T cells: an immunotherapeutic approach for HIV cure strategies
Source: JCI journal article supplement (doi:10.1172/jci.insight.120121), 2018-06-20
Supplement: sd1 [file 1]

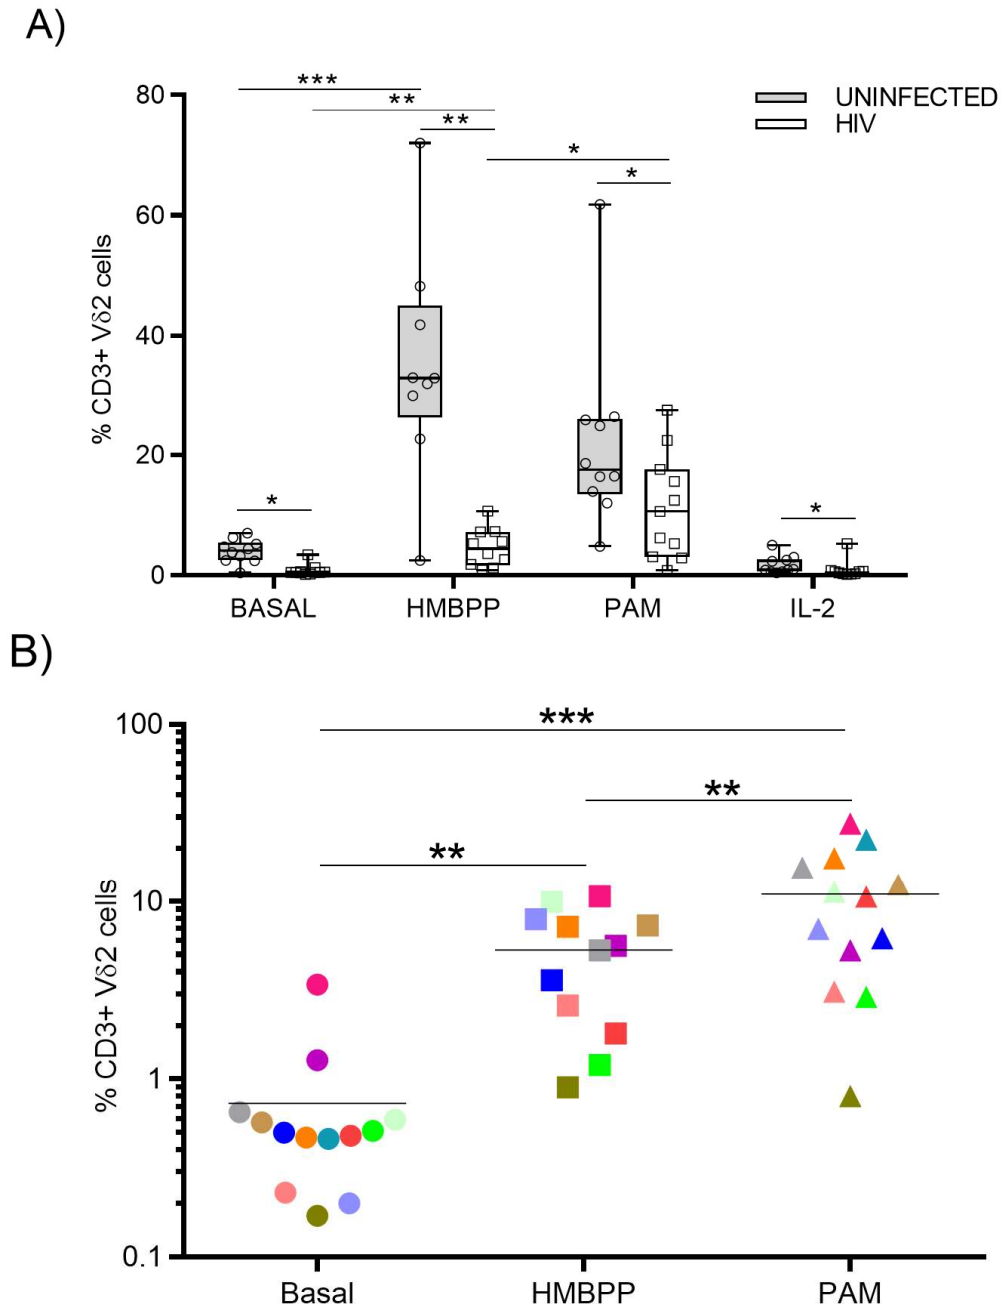

**Figure S1. Percentage of Vδ2 cells after six days of culture. A) Basal and expanded Vδ2 cell frequency.**

Vδ2 cells frequencies from ART-suppressed HIV-infected donors achieve greater values when expanded with pamidronate (PAM)+IL-2. **B) Detailed comparison of Vδ2 cell numbers after exposure to HMBPP and PAM in HIV-infected donors.** Each symbol shape represents one condition and each individual donor is represented by a different color. Mann Whitney U-test. \*p<0.05, \*\*p<0.005, \*\*\*p<0.0005.

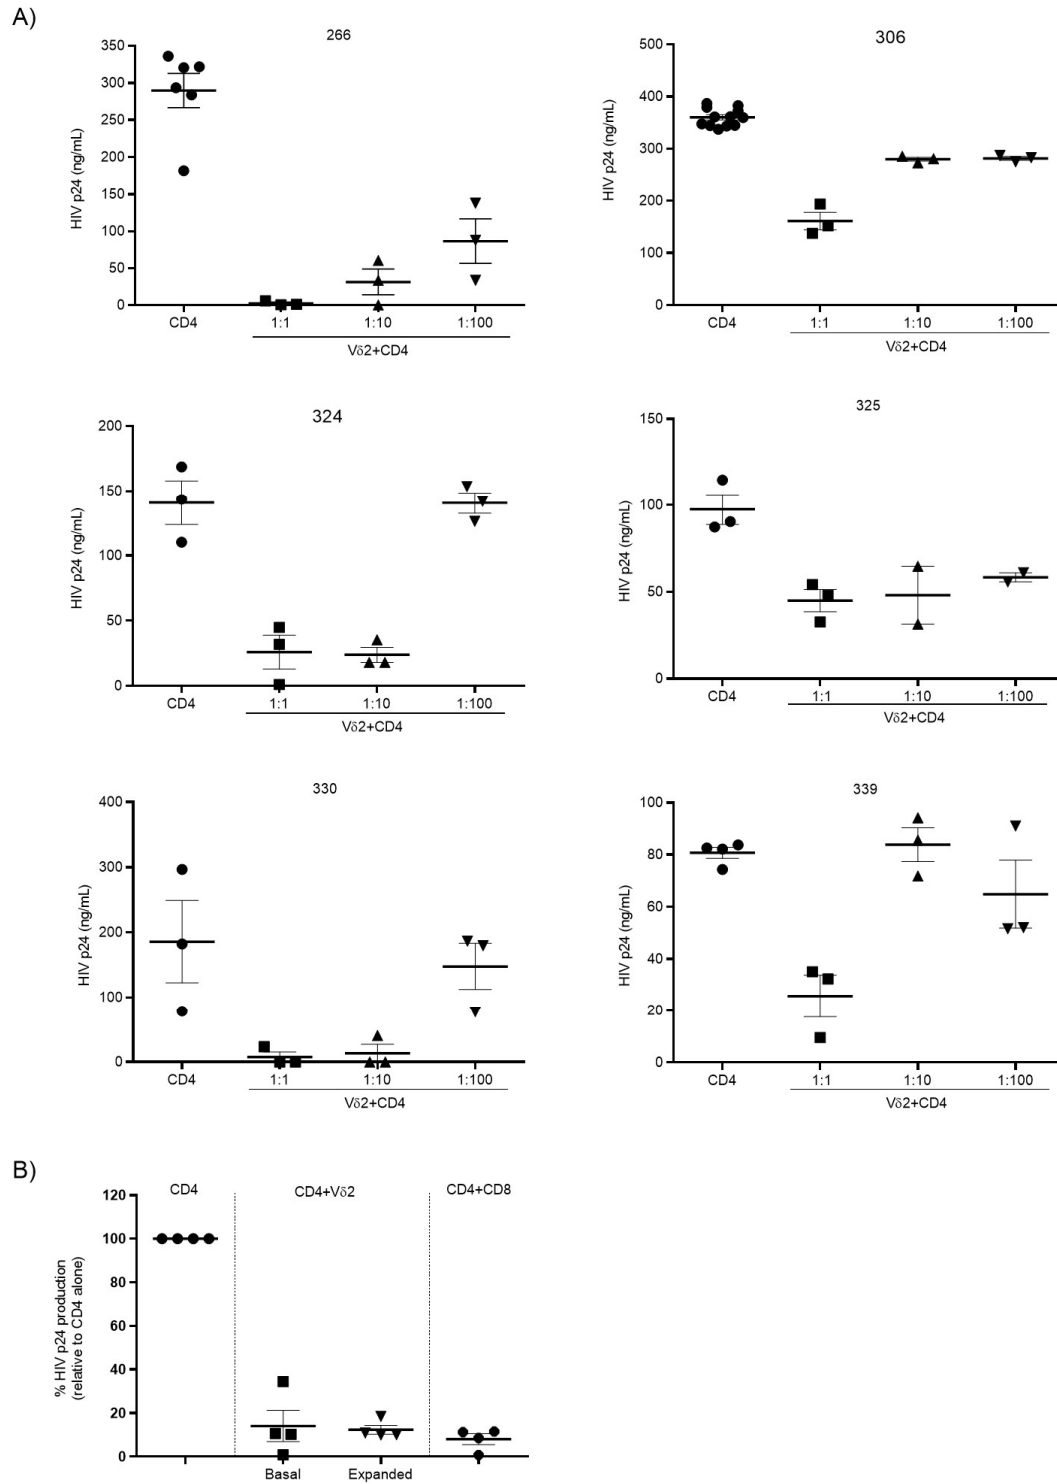

**Figure S2. A)** Examples of individual HIV p24 production by isolated V $\delta$ 2 T cells expanded with pamidronate (PAM) compared to CD4 cells cultured alone. **B)** Comparison of inhibition capacity between basal and expanded V $\delta$ 2 cells with CD8 T cells at 1:1 effector:target cell (N= 4, Mann-Whitney U-test).

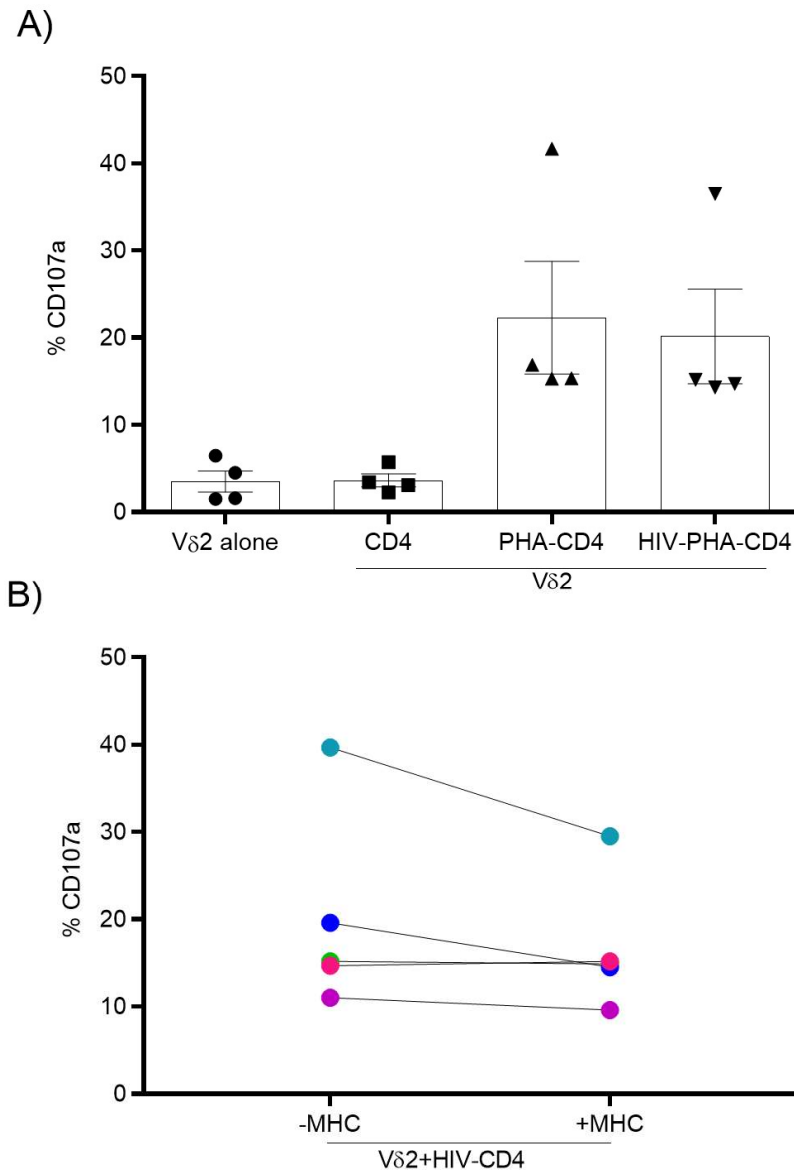

**Figure S3. Cytotoxic assays. A) Vδ2 cells degranulate in response to PHA.** CD107a production from Vδ2 cells cocultured with PHA-activated HIV-superinfected CD4 cells is comparable to that produced after coculture with PHA-activated but not superinfected CD4 cells. **B) MHC-blocking experiments.** Expanded Vδ2 cells were incubated with a pan-HLA monoclonal antibody prior to coculture with autologous HIV-superinfected CD4 cells.
